# Supplementary material for: Maintenance BEZ235 Treatment Prolongs the Therapeutic Effect of the Combination of BEZ235 and Radiotherapy for Colorectal Cancer
Source: MDPI journal article supplement (doi:10.3390/cancers11081204), 2019-08-19
Supplement: s1 [file s1]

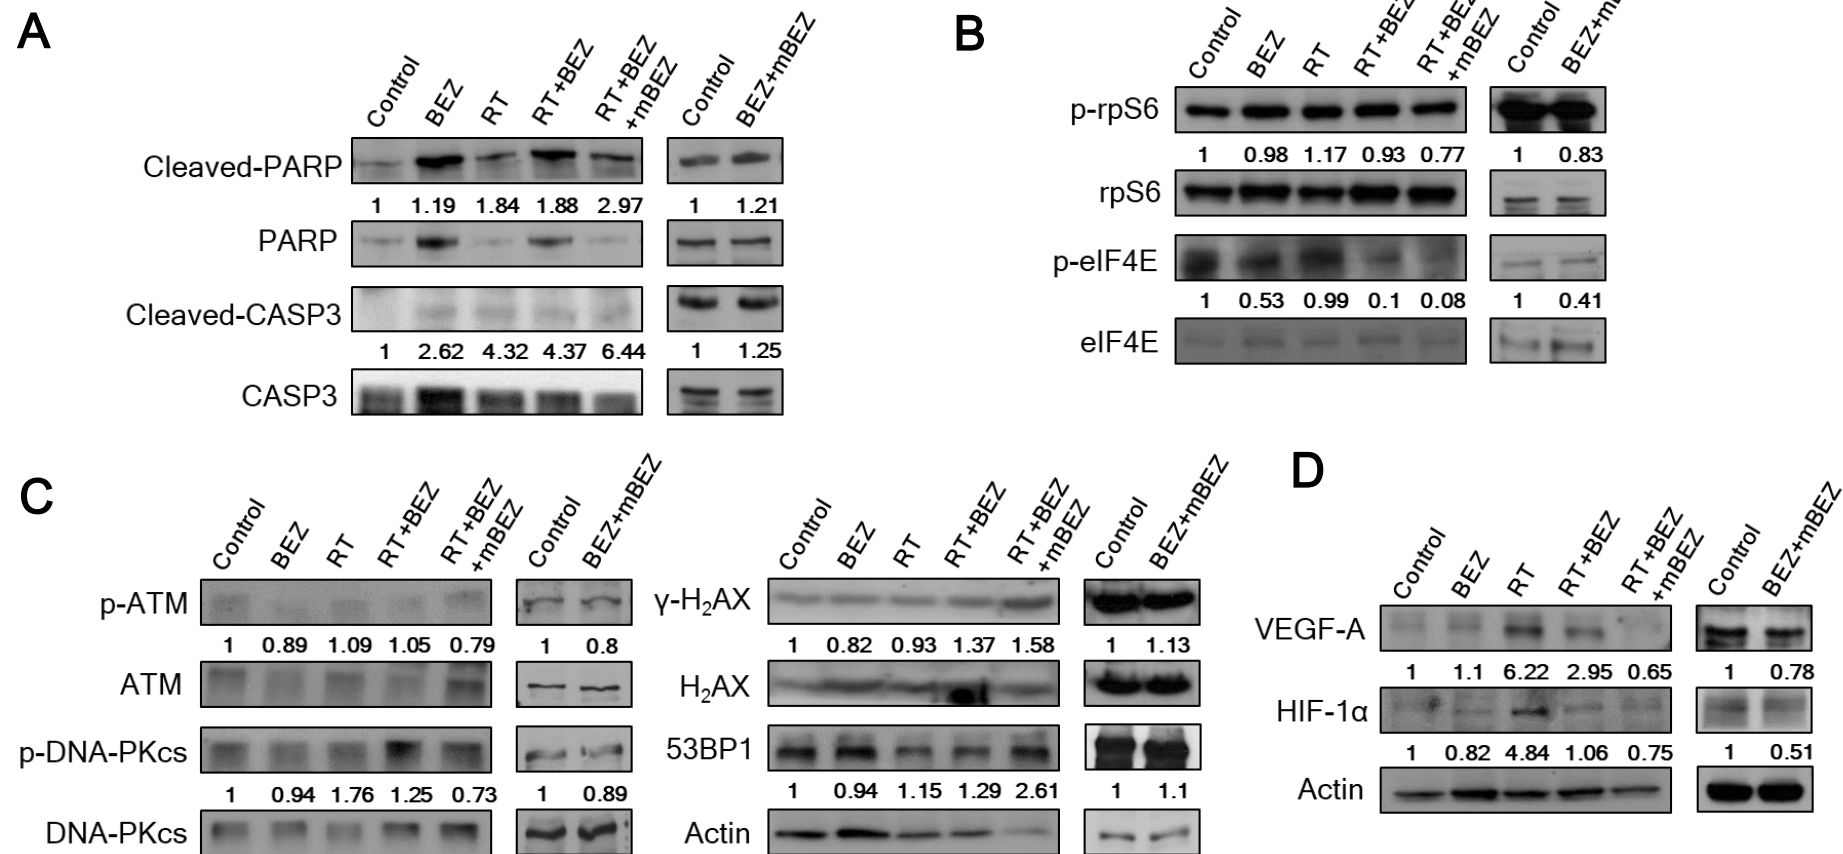

**Supplementary Figure 6.** Protein expression levels following each treatment were evaluated in HCT116 xenograft tissue via western blotting. The expression levels of (A) cleaved PARP and cleaved caspase 3 (CASP3); (B) p-rps6 and p-eIF4E; (C) p-ATM, p-DNA-PKcs,  $\gamma$ -H<sub>2</sub>AX, and 53BP1; and (D) VEGF-A and HIF-1 $\alpha$  following each treatment, including control, BEZ235 (BEZ), RT, RT+BEZ, RT+BEZ+mBEZ, and BEZ+mBEZ groups.
