# Supplementary material for: Maintenance BEZ235 Treatment Prolongs the Therapeutic Effect of the Combination of BEZ235 and Radiotherapy for Colorectal Cancer
Source: MDPI journal article supplement (doi:10.3390/cancers11081204), 2019-08-19
Supplement: s1 [file s1]

**A**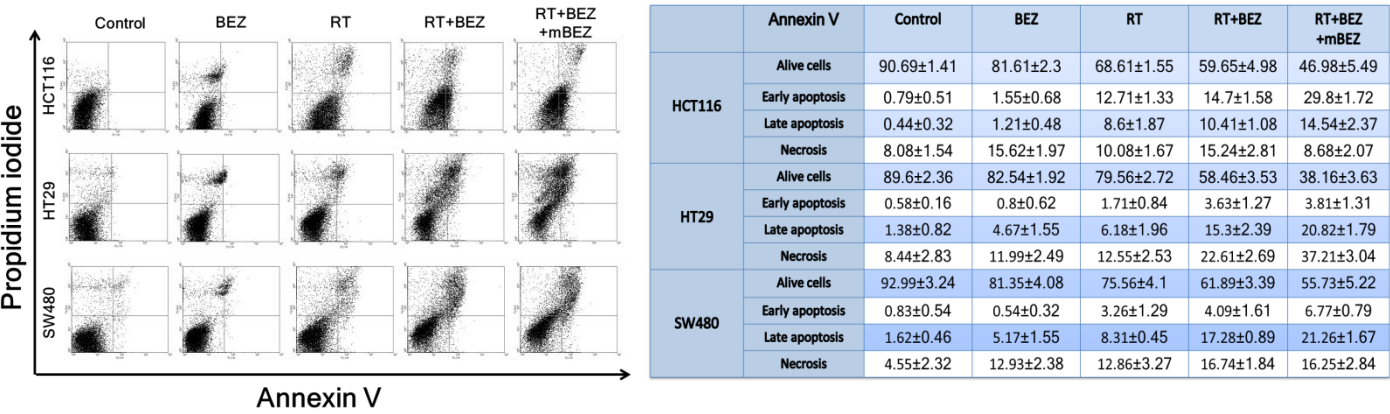**B**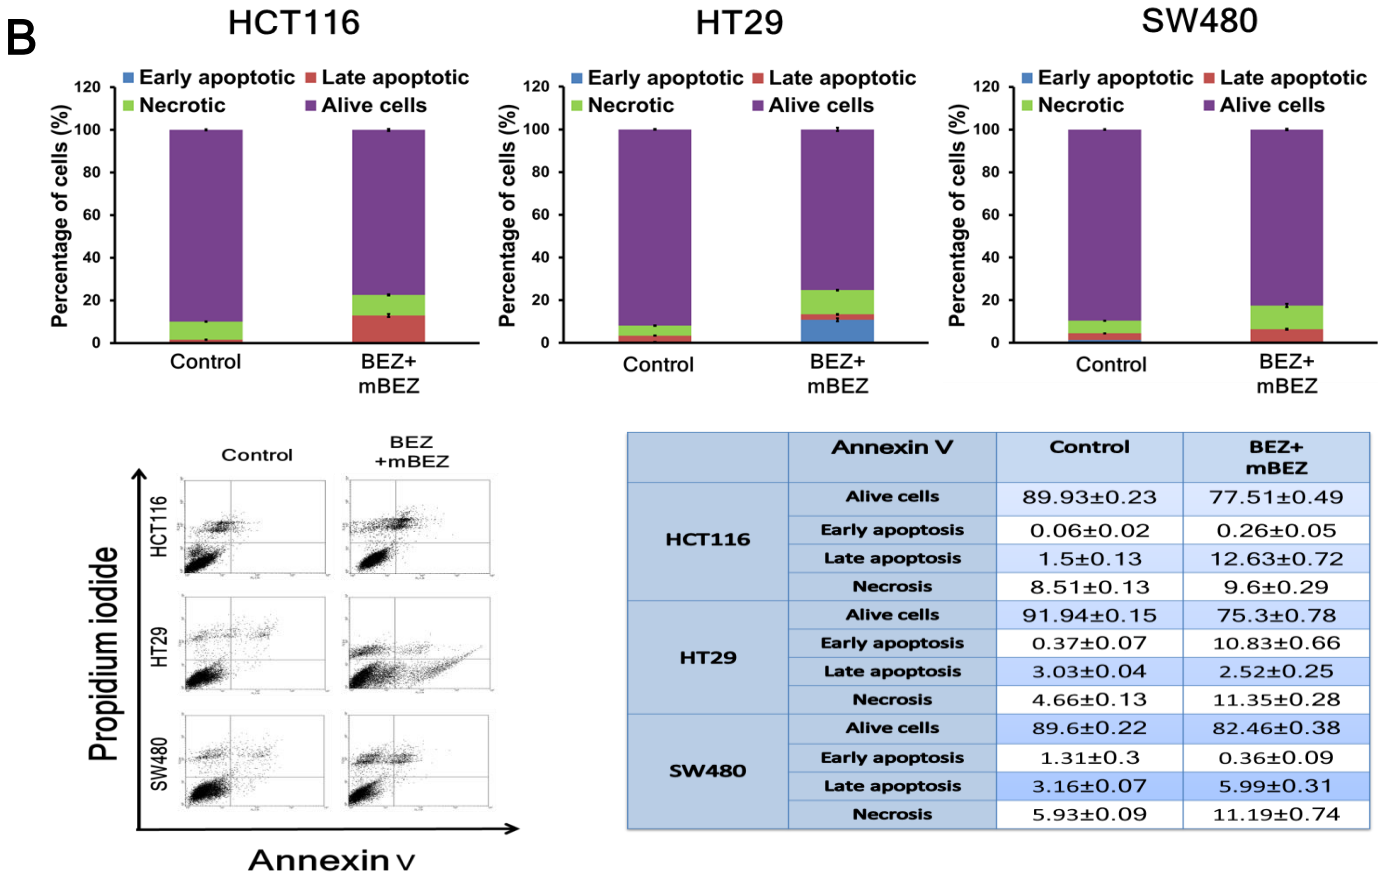

**Supplementary Figure 2.** (A) Flow cytometry apoptosis analysis by annexin V staining of HCT116, HT29, and SW480 cells following control, BEZ235 (BEZ), RT, RT+BEZ, and RT+BEZ+mBEZ treatments. Summary of the annexin V-FITC apoptosis assay results showing the percentages of early apoptotic, late apoptotic, necrotic, and living cells. The results are expressed as the mean  $\pm$  SE of three experiments from each of the three CRC cell lines. Annexin V staining revealed that RT+BEZ+mBEZ treatment resulted in more predominant apoptosis than BEZ, RT, RT+BEZ, and control treatments. (B) Flow cytometry apoptosis analysis by annexin V staining of HCT116, HT29, and SW480 cells following control and BEZ+mBEZ treatments. Annexin V staining revealed that BEZ+mBEZ treatment resulted in more predominant apoptosis than control treatments.
