# Supplementary material for: Maintenance BEZ235 Treatment Prolongs the Therapeutic Effect of the Combination of BEZ235 and Radiotherapy for Colorectal Cancer
Source: MDPI journal article supplement (doi:10.3390/cancers11081204), 2019-08-19
Supplement: s1 [file s1]

**A**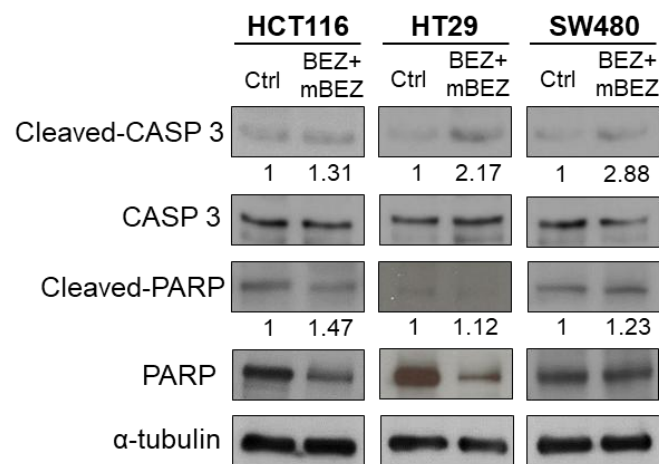**B**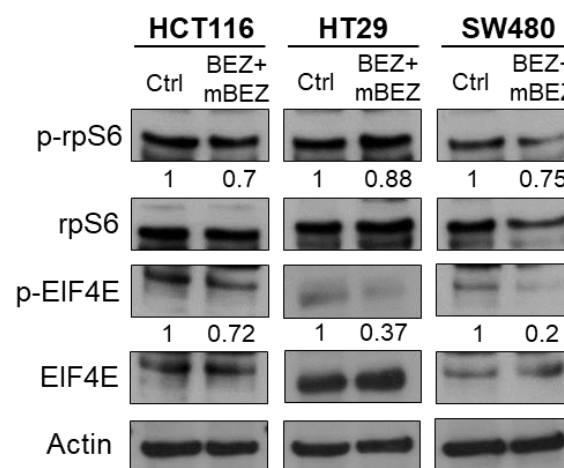**C**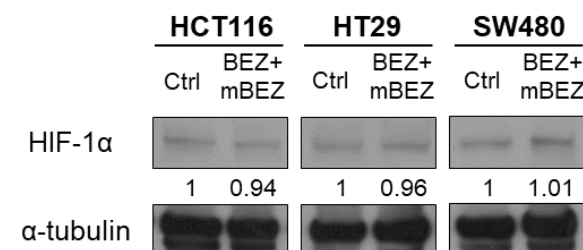**D**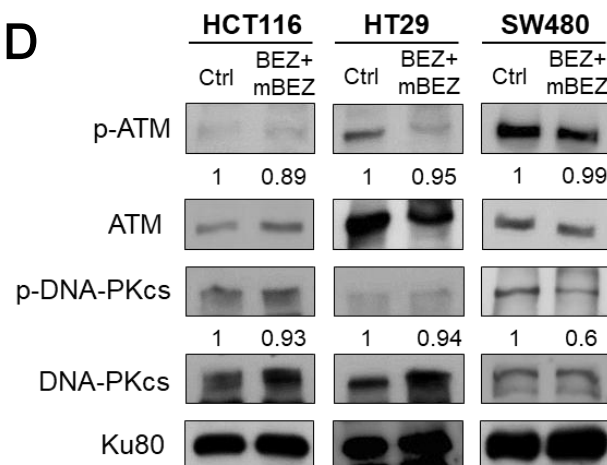**E**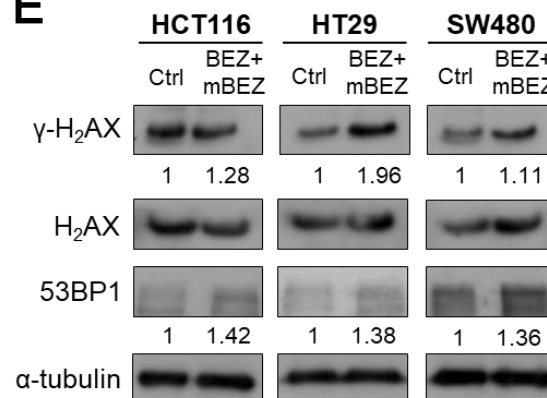

**Supplementary Figure 3.** BEZ235+mBEZ235 treatment (A) increased expression of apoptosis-related molecules, cleaved caspase 3 [CASP 3] and cleaved PARP (B) attenuated mTOR signaling molecules expression (p-rpS6 and p-eIF4E) (C) did not alter expression of angiogenesis-associated molecules, HIF-1α (D) slightly downregulated expression of p-ATM and DNA-PKcs (DNA-repair) (E) increased DNA damage-related molecules, 53BP1 and γ-H2AX.
